# Supplementary material for: A combination of the “pillaring” strategy and chiral induction: an approach to prepare homochiral three-dimensional coordination polymers from achiral precursors
Source: Royal Society of Chemistry journal article supplement (doi:10.1039/c4cc03478c), 2014-01-01

## *SUPPORTING INFORMATION*

# **Combination of “pillaring” strategy and chiral induction: an approach to prepare homochiral three-dimensional coordination polymers from achiral precursors**

*Yuehong Wen, Tianlu Sheng, Zhihao Sun, Zhenzhen Xue, Yanlong Wang, Yong Wang, Shengmin Hu, Xiao Ma, and Xintao Wu\**

*State Key Laboratory of Structure Chemistry Fujian Institute of Research on the Structure of Matter, Chinese Academy of Sciences, Fuzhou, 350002, China.*

*E-mail: wxt@fjirsm.ac.cn; Fax: +86-591-83719238; Tel: +86-591-83719238*

### **Table of Contents**

***S1*** Experimental section.

***Table S1*** Crystallographic data and refinement details for complexes **1-4**.

***Table S2*** Selected bond lengths (Å) and angles (°) of complexes **1-4**.

***Table S3*** Summary of multiple crystal datas for CPs **2M** and **2P**.

***Figure S1*** Structural formulas of the chiral inducing agents.

***Figure S2*** Crystal structures for CPs **1-4**.

***Figure S3*** PXRD patterns for CPs **1-4**.

***Figure S4*** TGA plots for CPs **1-4**.

***Figure S5*** The emission spectra of complexes **1-4** in solid state at room temperature.

***Figure S6*** Solid state CD spectra for different experiments.

***Figure S7*** Solid state UV-Vis spectra of CPs **2**.

## ***SI. Experimental Section***

**SI.1 Materials and Methods.** All chemicals were purchased commercially and used without further purification except **L**. The hydrogenated Schiff base **L** (1,2-bis(4'-pyridylmethylamino)ethane) was prepared according to the reported method.<sup>1</sup> The structural determination of single crystal was performed on Rigaku SCXmini diffractometer with graphite-monochromated Mo-K $\alpha$  ( $\lambda = 0.71073 \text{ \AA}$ ) radiation at room temperature. Empirical absorption corrections were applied to the data using the SADABS program.<sup>2</sup> The structures were solved by the direct method and refined by the full-matrix least-squares on  $F^2$  using the SHELXL-97 program.<sup>3</sup> All of the non-hydrogen atoms were refined anisotropically, and the hydrogen atoms attached to carbon were located at their ideal positions. Elemental analyses (C, H, and N) were performed with a Vario MICRO CHNOS Elemental Analyzer. The infrared spectra with KBr pellet were recorded in the range of 4000–400  $\text{cm}^{-1}$  on a Perkin-Elmer Spectrum One FT-IR Spectrometer. Powder X-ray diffraction (PXRD) data were collected on a DMAX-2500 diffractometer with Cu-K $\alpha$ . Thermal analyses were performed on a NETZSCH STA 449C instrument from room temperature to 1000  $^{\circ}\text{C}$  with a heating rate of 10  $^{\circ}\text{C min}^{-1}$  under nitrogen flow. Circular dichroism (CD) spectra were conducted on a Jasco J-810 spectrodichrometer. The solid-state luminescence emission/excitation spectra were recorded on a FLS920 fluorescence spectrophotometer. The solid state UV–Vis spectra were recorded on PerkinElmer Lambda-900 spectrometer and BaSO<sub>4</sub> was used as the reference.

1. a) B. -L. Fei, W. -Y. Sun, K. -B. Yu and W. -X. Tang, *J. Chem. Soc., Dalton Trans.*, **2000**, 805;  
b) A. Jäntti, K. Rissanen and J. Valkonen, *Acta Chem. Scand.*, **1998**, 52, 1010.
2. G. M. Sheldrick, SADABS. University of Göttingen: Göttingen, Germany, **1996**.
3. G. M. Sheldrick, SHELXTL-97: Program for Refining Crystal Structure Refinement, University of Göttingen, Germany, **1997**.

### **SI.2 Synthesis of coordination polymers 1-4.**

**Synthesis of 1:** To a solution of **L** (48 mg, 0.2 mmol) in H<sub>2</sub>O/EtOH (2 mL/2 mL), a solution of Zn(NO<sub>3</sub>)<sub>2</sub>·6H<sub>2</sub>O (60 mg, 0.2 mmol) in 6 mL H<sub>2</sub>O was added. After 20 min, the mixture was filtered and the filtrate was evaporated to yield colorless crystals **1** (75 mg, 80%). Elemental analysis calcd (%) for C<sub>14</sub>H<sub>22</sub>N<sub>6</sub>O<sub>8</sub>Zn: C 35.95, H 4.74, N 17.97; found: C 35.10, H 4.94, N 18.28. IR (solid KBr pellet,  $\nu/\text{cm}^{-1}$ ) 3245 (m), 3070 (vw), 2962 (vw), 2918 (w), 2882 (vw), 2362 (m), 2337 (w), 1957 (vw), 1620 (s), 1561 (m), 1430 (m), 1379 (s), 1291 (s), 1223 (m), 1016 (s), 970 (m), 843 (m), 822 (m), 805 (s), 641 (m), 632 (m), 501 (m).

**Synthesis of conglomerate 2, 2M, and 2P:** Complex **2** was prepared by layering a solution of Na<sub>2</sub>MoO<sub>4</sub>·2H<sub>2</sub>O (48 mg, 0.2 mmol) in H<sub>2</sub>O/EtOH (2 mL/4 mL) over the mixture of **L** (48 mg, 0.2 mmol) and Zn(NO<sub>3</sub>)<sub>2</sub>·6H<sub>2</sub>O (60 mg, 0.2 mmol) in H<sub>2</sub>O/EtOH (8 mL/2 mL). Colorless crystals **2** were isolated after one month. Yield: 46 mg, 40%. The preparation of **2M** is similar to that of **2**, except for the addition of a solution of (1S)-(+)-10-camphorsulfonic acid (46 mg, 0.2 mmol) in 4 ml H<sub>2</sub>O to the mixture of **L** and Zn(II) before diffusion. Yield: 12 mg, 11%. The preparation of **2P** is similar to that of **2**, except for the addition of a solution of (1R)-(-)-10-camphorsulfonic acid (46 mg, 0.2 mmol) in 4 ml H<sub>2</sub>O to the mixture of **L** and Zn(II). Yield: 14 mg, 12%. Elemental analysis calcd (%) for C<sub>14</sub>H<sub>30</sub>N<sub>4</sub>O<sub>10</sub>ZnMo (**2P**): C 29.21, H 5.25, N 9.73; found: C 29.12, H 5.30, N 10.19;

Elemental analysis calcd (%) for C<sub>14</sub>H<sub>26</sub>N<sub>4</sub>O<sub>8</sub>ZnMo (**2M**): C 31.16, H 4.86, N 10.38; found: C 31.51, H 4.57, N 10.34. IR (solid KBr pellet,  $\nu/\text{cm}^{-1}$ ) 3363 (m), 3238 (vw), 3198 (m), 3028 (vw), 2970 (w), 2918 (w), 2863 (w), 2358 (w), 2229 (vw), 1622 (s), 1558 (m), 1476 (m), 1446 (m), 1415 (m), 1223 (m), 1110 (w), 1071 (m), 1013 (m), 952 (w), 921 (s), 888 (s), 851 (s), 812 (s), 796 (s), 741 (m), 638 (m), 610 (m), 507 (m).

**Synthesis of 3:** The preparation of colorless crystals **3** is similar to that of **2**, except for the use of Na<sub>2</sub>SO<sub>4</sub> instead of Na<sub>2</sub>MoO<sub>4</sub>. Yield: 49 mg, 46%. Elemental analysis calcd (%) for C<sub>14</sub>H<sub>32</sub>N<sub>4</sub>O<sub>11</sub>SZn: C 31.73, H 6.09, N 10.57; found: C 31.95, H 5.75, N 10.69. IR (solid KBr pellet,  $\nu/\text{cm}^{-1}$ ) 3427 (m), 3192 (m), 3070 (vw), 2970 (w), 2933 (w), 2890 (w), 1619 (s), 1558 (m), 1491 (w), 1427 (m), 1232 (m), 1113 (s), 1058 (s), 1022 (m), 848 (m), 808 (m), 635 (m), 613 (m), 488 (m).

**Synthesis of 4:** The preparation of crystals **4** is similar to that of **2**, except that K<sub>2</sub>CrO<sub>4</sub> was used instead of Na<sub>2</sub>MoO<sub>4</sub>. Yield: 44 mg, 41%. Elemental analysis calcd (%) for C<sub>14</sub>H<sub>30</sub>N<sub>4</sub>O<sub>10</sub>CrZn: C 31.62, H 5.69, N 10.54; found: C 31.12, H 5.59, N 10.42. IR (solid KBr pellet,  $\nu/\text{cm}^{-1}$ ) 3403 (m), 3171 (m), 2933 (w), 2881 (w), 1616 (s), 1558 (m), 1470 (w), 1427 (m), 1354 (w), 1229 (m), 1068 (m), 1025 (m), 988 (m), 885 (s), 842 (m), 805 (m), 632 (m), 491 (m).

**Table S1** Crystallographic data and refinement details for complexes **1-4**.

| compound                                                               | <b>1</b>                                                                        | <b>2M</b>                                                                                      | <b>2P</b>                                                                                      | <b>3</b>                                                                                      | <b>4</b>                                                                                       |
|------------------------------------------------------------------------|---------------------------------------------------------------------------------|------------------------------------------------------------------------------------------------|------------------------------------------------------------------------------------------------|-----------------------------------------------------------------------------------------------|------------------------------------------------------------------------------------------------|
| Empirical formula                                                      | C <sub>56</sub> H <sub>88</sub> N <sub>24</sub> O <sub>32</sub> Zn <sub>4</sub> | C <sub>28</sub> H <sub>52</sub> N <sub>8</sub> O <sub>16</sub> Zn <sub>2</sub> Mo <sub>2</sub> | C <sub>28</sub> H <sub>60</sub> N <sub>8</sub> O <sub>20</sub> Zn <sub>2</sub> Mo <sub>2</sub> | C <sub>28</sub> H <sub>64</sub> N <sub>8</sub> O <sub>22</sub> S <sub>2</sub> Zn <sub>2</sub> | C <sub>28</sub> H <sub>60</sub> N <sub>8</sub> O <sub>20</sub> Cr <sub>2</sub> Zn <sub>2</sub> |
| <i>M</i>                                                               | 467.75                                                                          | 539.70                                                                                         | 575.73                                                                                         | 529.87                                                                                        | 531.79                                                                                         |
| Crystal system                                                         | monoclinic                                                                      | monoclinic                                                                                     | monoclinic                                                                                     | monoclinic                                                                                    | monoclinic                                                                                     |
| Space group                                                            | <i>C2/c</i>                                                                     | <i>C2</i>                                                                                      | <i>C2</i>                                                                                      | <i>C2</i>                                                                                     | <i>C2</i>                                                                                      |
| <i>a</i> (Å)                                                           | 14.043(2)                                                                       | 13.901(7)                                                                                      | 13.971(19)                                                                                     | 13.783(9)                                                                                     | 13.85(3)                                                                                       |
| <i>b</i> (Å)                                                           | 12.4823(15)                                                                     | 12.713(6)                                                                                      | 12.841(19)                                                                                     | 12.697(9)                                                                                     | 12.77(2)                                                                                       |
| <i>c</i> (Å)                                                           | 12.349(2)                                                                       | 7.070(3)                                                                                       | 7.137(11)                                                                                      | 6.743(5)                                                                                      | 6.939(14)                                                                                      |
| $\alpha$ (°)                                                           | 90.00                                                                           | 90.00                                                                                          | 90                                                                                             | 90                                                                                            | 90                                                                                             |
| $\beta$ (°)                                                            | 111.890(8)                                                                      | 91.139(9)                                                                                      | 90.74(5)                                                                                       | 90.759(14)                                                                                    | 91.45(3)                                                                                       |
| $\gamma$ (°)                                                           | 90.00                                                                           | 90.00                                                                                          | 90                                                                                             | 90                                                                                            | 90                                                                                             |
| <i>V</i> /Å <sup>3</sup>                                               | 2008.6(6)                                                                       | 1249.1(10)                                                                                     | 1280(3)                                                                                        | 1180.1(14)                                                                                    | 1227(4)                                                                                        |
| <i>Z</i>                                                               | 4                                                                               | 2                                                                                              | 2                                                                                              | 2                                                                                             | 2                                                                                              |
| <i>D<sub>c</sub></i> /g cm <sup>-3</sup>                               | 1.547                                                                           | 1.435                                                                                          | 1.493                                                                                          | 1.491                                                                                         | 1.440                                                                                          |
| $\mu/\text{mm}^{-1}$                                                   | 1.277                                                                           | 1.501                                                                                          | 1.475                                                                                          | 1.188                                                                                         | 1.471                                                                                          |
| $\theta_{\text{range}}$ (°)                                            | 3.22-24.49                                                                      | 2.88- 27.58                                                                                    | 2.15-25.00                                                                                     | 3.02-27.44                                                                                    | 2.17-27.37                                                                                     |
| <i>h, k, l, ranges</i>                                                 | -18 to 18, -16 to 16, -16 to 13                                                 | -18 to 12, -16 to 16, -9 to 9                                                                  | -16 to 16, -15 to 14, -8 to 7                                                                  | -17 to 17, -16 to 16, -8 to 8                                                                 | -17 to 17, -16 to 15, -8 to 8                                                                  |
| <i>F</i> (000)                                                         | 968                                                                             | 548                                                                                            | 588                                                                                            | 556                                                                                           | 552                                                                                            |
| <i>R<sub>1</sub></i> , <sup>a</sup> <i>wR<sub>2</sub></i> <sup>b</sup> | 0.0606,                                                                         | 0.0402,                                                                                        | 0.0761,                                                                                        | 0.0606,                                                                                       | 0.0614,                                                                                        |
| [ <i>I</i> > 2σ( <i>I</i> )]                                           | 0.1705                                                                          | 0.0966                                                                                         | 0.2024                                                                                         | 0.1534                                                                                        | 0.1571                                                                                         |
| GOF on <i>F</i> <sup>2</sup>                                           | 1.056                                                                           | 0.973                                                                                          | 0.972                                                                                          | 1.065                                                                                         | 1.002                                                                                          |

<sup>a</sup>  $R = \sum(|F_o| - |F_c|)/\sum|F_o|$ . <sup>b</sup>  $R_w = \{\sum w[(F_o^2 - F_c^2)^2]/\sum w[(F_o^2)^2]\}^{1/2}$ .

**Table S2 Selected bond lengths (Å) and angles (°) of complexes 1-4.****Table S2.1 Selected bond lengths (Å) and angles (°) of complex 1.**

|                                            |            |                                            |            |
|--------------------------------------------|------------|--------------------------------------------|------------|
| Zn(1)-N(1) <sup>a</sup>                    | 2.154(3)   | N(1) <sup>a</sup> -Zn(1)-O(1)              | 88.53(11)  |
| Zn(1)-N(1)                                 | 2.154(3)   | N(1)-Zn(1)-O(1)                            | 91.14(11)  |
| Zn(1)-N(2) <sup>b</sup>                    | 2.168(3)   | N(2) <sup>b</sup> -Zn(1)-O(1)              | 87.82(11)  |
| Zn(1)-N(2) <sup>c</sup>                    | 2.168(3)   | N(2) <sup>c</sup> -Zn(1)-O(1)              | 92.50(12)  |
| Zn(1)-O(1)                                 | 2.252(3)   | N(1) <sup>a</sup> -Zn(1)-O(1) <sup>a</sup> | 91.14(11)  |
| Zn(1)-O(1) <sup>a</sup>                    | 2.252(3)   | N(1)-Zn(1)-O(1) <sup>a</sup>               | 88.53(11)  |
| C(1)-N(1)                                  | 1.476(5)   | N(2) <sup>b</sup> -Zn(1)-O(1) <sup>a</sup> | 92.50(12)  |
| C(2)-N(1)                                  | 1.479(4)   | N(2) <sup>c</sup> -Zn(1)-O(1) <sup>a</sup> | 87.82(11)  |
| C(5)-N(2)                                  | 1.302(6)   | O(1)-Zn(1)-O(1) <sup>a</sup>               | 179.56(15) |
| N(3)-O(2)                                  | 1.208(6)   | C(1)-N(1)-C(2)                             | 113.3(3)   |
| N(3)-O(3)                                  | 1.221(5)   | C(1)-N(1)-Zn(1)                            | 106.2(2)   |
| N(3)-O(1)                                  | 1.251(5)   | C(2)-N(1)-Zn(1)                            | 116.0(2)   |
| N(2)-Zn(1) <sup>d</sup>                    | 2.168(3)   | O(2)-N(3)-O(3)                             | 119.2(5)   |
| N(1) <sup>a</sup> -Zn(1)-N(1)              | 82.42(15)  | O(2)-N(3)-O(1)                             | 120.8(4)   |
| N(1) <sup>a</sup> -Zn(1)-N(2) <sup>b</sup> | 95.12(11)  | O(3)-N(3)-O(1)                             | 120.0(4)   |
| N(1)-Zn(1)-N(2) <sup>b</sup>               | 177.36(10) | C(5)-N(2)-C(6)                             | 114.6(4)   |
| N(1) <sup>a</sup> -Zn(1)-N(2) <sup>c</sup> | 177.36(10) | C(5)-N(2)-Zn(1) <sup>d</sup>               | 123.6(3)   |
| N(1)-Zn(1)-N(2) <sup>c</sup>               | 95.12(11)  | C(6)-N(2)-Zn(1) <sup>d</sup>               | 121.7(3)   |
| N(2) <sup>b</sup> -Zn(1)-N(2) <sup>c</sup> | 87.35(16)  | N(3)-O(1)-Zn(1)                            | 131.4(3)   |

Symmetry codes: (a) -x+1, y, -z+1/2; (b) x+1/2, y+1/2, z; (c) -x+1/2, y+1/2, -z+1/2; (d) x-1/2, y-1/2, z.

**Table S2.2 Selected bond lengths (Å) and angles (°) of complex 2M.**

|                                            |            |                                            |            |
|--------------------------------------------|------------|--------------------------------------------|------------|
| Zn(1)-O(1)                                 | 2.125(4)   | O(1) <sup>a</sup> -Zn(1)-N(1)              | 90.48(15)  |
| Zn(1)-O(1) <sup>a</sup>                    | 2.125(4)   | N(2) <sup>b</sup> -Zn(1)-N(1)              | 176.53(16) |
| Zn(1)-N(2) <sup>b</sup>                    | 2.173(4)   | N(2) <sup>c</sup> -Zn(1)-N(1)              | 95.42(15)  |
| Zn(1)-N(2) <sup>c</sup>                    | 2.173(4)   | O(1)-Zn(1)-N(1) <sup>a</sup>               | 90.48(15)  |
| Zn(1)-N(1)                                 | 2.197(4)   | O(1) <sup>a</sup> -Zn(1)-N(1) <sup>a</sup> | 88.78(15)  |
| Zn(1)-N(1) <sup>a</sup>                    | 2.197(4)   | N(2) <sup>b</sup> -Zn(1)-N(1) <sup>a</sup> | 95.42(15)  |
| Mo(1)-O(2) <sup>d</sup>                    | 1.746(4)   | N(2) <sup>c</sup> -Zn(1)-N(1) <sup>a</sup> | 176.53(17) |
| Mo(1)-O(2)                                 | 1.746(4)   | N(1)-Zn(1)-N(1) <sup>a</sup>               | 81.3(2)    |
| Mo(1)-O(1) <sup>d</sup>                    | 1.773(3)   | O(2) <sup>d</sup> -Mo(1)-O(2)              | 108.3(4)   |
| Mo(1)-O(1)                                 | 1.773(3)   | O(2) <sup>d</sup> -Mo(1)-O(1) <sup>d</sup> | 108.7(2)   |
| C(2)-N(1)                                  | 1.441(7)   | O(2)-Mo(1)-O(1) <sup>d</sup>               | 110.1(2)   |
| C(1)-N(1)                                  | 1.469(6)   | O(2) <sup>d</sup> -Mo(1)-O(1)              | 110.1(2)   |
| C(6)-N(2)                                  | 1.307(7)   | O(2)-Mo(1)-O(1)                            | 108.7(2)   |
| C(5)-N(2)                                  | 1.326(7)   | O(1) <sup>d</sup> -Mo(1)-O(1)              | 110.9(2)   |
| N(2)-Zn(1) <sup>e</sup>                    | 2.173(4)   | N(1)-C(2)-C(3)                             | 115.0(4)   |
| O(1)-Zn(1)-O(1) <sup>a</sup>               | 179.03(18) | C(2)-N(1)-C(1)                             | 115.1(4)   |
| O(1)-Zn(1)-N(2) <sup>b</sup>               | 90.15(15)  | C(2)-N(1)-Zn(1)                            | 116.5(3)   |
| O(1) <sup>a</sup> -Zn(1)-N(2) <sup>b</sup> | 90.54(15)  | C(1)-N(1)-Zn(1)                            | 107.8(3)   |

|                                            |           |                              |            |
|--------------------------------------------|-----------|------------------------------|------------|
| O(1)–Zn(1)–N(2) <sup>c</sup>               | 90.54(15) | C(6)–N(2)–C(5)               | 116.5(5)   |
| O(1) <sup>a</sup> –Zn(1)–N(2) <sup>c</sup> | 90.15(15) | C(6)–N(2)–Zn(1) <sup>e</sup> | 123.0(4)   |
| N(2) <sup>b</sup> –Zn(1)–N(2) <sup>c</sup> | 87.9(2)   | C(5)–N(2)–Zn(1) <sup>e</sup> | 120.5(4)   |
| O(1)–Zn(1)–N(1)                            | 88.78(15) | Mo(1)–O(1)–Zn(1)             | 141.29(19) |

Symmetry codes: (a) -x, y, -z-1; (b) x+1/2, y+1/2, z; (c) -x-1/2, y+1/2, -z-1; (d) -x, y, -z-2; (e) x-1/2, y-1/2, z.

**Table S2.3** Selected bond lengths (Å) and angles (°) of complex **2P**.

|                                            |           |                                            |           |
|--------------------------------------------|-----------|--------------------------------------------|-----------|
| Mo(1)–O(2)                                 | 1.740(19) | O(1)–Zn(1)–N(1) <sup>b</sup>               | 90.6(4)   |
| Mo(1)–O(2) <sup>a</sup>                    | 1.740(19) | O(1) <sup>b</sup> –Zn(1)–N(1) <sup>b</sup> | 90.5(4)   |
| Mo(1)–O(1)                                 | 1.769(9)  | O(1)–Zn(1)–N(1)                            | 90.5(4)   |
| Mo(1)–O(1) <sup>a</sup>                    | 1.769(9)  | O(1) <sup>b</sup> –Zn(1)–N(1)              | 90.6(4)   |
| Zn(1)–O(1)                                 | 2.146(10) | N(1) <sup>b</sup> –Zn(1)–N(1)              | 88.1(7)   |
| Zn(1)–O(1) <sup>b</sup>                    | 2.146(10) | O(1)–Zn(1)–N(2) <sup>c</sup>               | 88.6(4)   |
| Zn(1)–N(1) <sup>b</sup>                    | 2.150(13) | O(1) <sup>b</sup> –Zn(1)–N(2) <sup>c</sup> | 90.3(4)   |
| Zn(1)–N(1)                                 | 2.150(13) | N(1) <sup>b</sup> –Zn(1)–N(2) <sup>c</sup> | 175.5(5)  |
| Zn(1)–N(2) <sup>c</sup>                    | 2.223(11) | N(1)–Zn(1)–N(2) <sup>c</sup>               | 96.3(5)   |
| Zn(1)–N(2) <sup>d</sup>                    | 2.223(11) | O(1)–Zn(1)–N(2) <sup>d</sup>               | 90.3(4)   |
| C(3)–N(1)                                  | 1.33(2)   | O(1) <sup>b</sup> –Zn(1)–N(2) <sup>d</sup> | 88.6(4)   |
| C(6)–N(2)                                  | 1.50(2)   | N(1) <sup>b</sup> –Zn(1)–N(2) <sup>d</sup> | 96.3(5)   |
| C(7)–N(2)                                  | 1.396(19) | N(1)–Zn(1)–N(2) <sup>d</sup>               | 175.5(5)  |
| N(2)–Zn(1) <sup>f</sup>                    | 2.223(11) | N(2) <sup>c</sup> –Zn(1)–N(2) <sup>d</sup> | 79.2(7)   |
| O(2)–Mo(1)–O(2) <sup>a</sup>               | 106.3(10) | C(1)–N(1)–C(3)                             | 112.7(14) |
| O(2)–Mo(1)–O(1)                            | 111.5(6)  | C(1)–N(1)–Zn(1)                            | 121.6(11) |
| O(2) <sup>a</sup> –Mo(1)–O(1)              | 108.4(6)  | C(3)–N(1)–Zn(1)                            | 125.6(11) |
| O(2)–Mo(1)–O(1) <sup>a</sup>               | 108.4(6)  | C(7)–N(2)–C(6)                             | 120.0(13) |
| O(2) <sup>a</sup> –Mo(1)–O(1) <sup>a</sup> | 111.5(6)  | C(7)–N(2)–Zn(1) <sup>f</sup>               | 107.4(11) |
| O(1)–Mo(1)–O(1) <sup>a</sup>               | 110.8(6)  | C(6)–N(2)–Zn(1) <sup>f</sup>               | 115.2(9)  |
| O(1)–Zn(1)–O(1) <sup>b</sup>               | 178.6(5)  | Mo(1)–O(1)–Zn(1)                           | 143.0(6)  |

Symmetry codes: (a) -x, y, -z+1; (b) -x, y, -z; (c) -x+1/2, y+1/2, -z; (d) x-1/2, y+1/2, z; (e) -x+1, y, -z; (f) x+1/2, y-1/2, z.

**Table S2.4** Selected bond lengths (Å) and angles (°) of complex **3**.

|                         |           |                                            |           |
|-------------------------|-----------|--------------------------------------------|-----------|
| Zn(1)–N(2)              | 2.147(6)  | N(2)–Zn(1)–N(2) <sup>a</sup>               | 87.0(3)   |
| Zn(1)–N(2) <sup>a</sup> | 2.147(6)  | N(2)–Zn(1)–N(3) <sup>b</sup>               | 177.5(3)  |
| Zn(1)–N(3) <sup>b</sup> | 2.163(6)  | N(2) <sup>a</sup> –Zn(1)–N(3) <sup>b</sup> | 95.40(15) |
| Zn(1)–N(3) <sup>c</sup> | 2.163(6)  | N(2)–Zn(1)–N(3) <sup>c</sup>               | 95.40(15) |
| Zn(1)–O(1) <sup>a</sup> | 2.223(4)  | N(2) <sup>a</sup> –Zn(1)–N(3) <sup>c</sup> | 177.5(3)  |
| Zn(1)–O(1)              | 2.223(4)  | N(3) <sup>b</sup> –Zn(1)–N(3) <sup>c</sup> | 82.2(3)   |
| C(1)–N(3)               | 1.466(8)  | N(2)–Zn(1)–O(1) <sup>a</sup>               | 89.5(2)   |
| C(2)–N(3)               | 1.474(9)  | N(2) <sup>a</sup> –Zn(1)–O(1) <sup>a</sup> | 89.67(19) |
| C(4)–N(2)               | 1.298(10) | N(3) <sup>b</sup> –Zn(1)–O(1) <sup>a</sup> | 91.1(2)   |
| C(5)–N(2)               | 1.326(9)  | N(3) <sup>c</sup> –Zn(1)–O(1) <sup>a</sup> | 89.8(2)   |
| N(3)–Zn(1) <sup>e</sup> | 2.163(6)  | N(2)–Zn(1)–O(1)                            | 89.67(19) |

|                              |          |                                           |          |
|------------------------------|----------|-------------------------------------------|----------|
| O(1)–S(1)                    | 1.473(4) | N(2) <sup>a</sup> –Zn(1)–O(1)             | 89.5(2)  |
| O(2)–S(1)                    | 1.462(5) | N(3) <sup>b</sup> –Zn(1)–O(1)             | 89.8(2)  |
| S(1)–O(2) <sup>f</sup>       | 1.462(5) | N(3) <sup>c</sup> –Zn(1)–O(1)             | 91.1(2)  |
| S(1)–O(1) <sup>f</sup>       | 1.473(4) | O(1) <sup>a</sup> –Zn(1)–O(1)             | 178.9(3) |
| C(5)–N(2)–Zn(1)              | 122.0(5) | S(1)–O(1)–Zn(1)                           | 139.2(3) |
| C(1)–N(3)–C(2)               | 114.1(5) | O(2)–S(1)–O(2) <sup>f</sup>               | 110.4(5) |
| C(1)–N(3)–Zn(1) <sup>e</sup> | 106.9(4) | O(2)–S(1)–O(1)                            | 109.6(3) |
| C(2)–N(3)–Zn(1) <sup>e</sup> | 116.1(4) | O(2) <sup>f</sup> –S(1)–O(1)              | 109.5(3) |
| C(4)–N(2)–C(5)               | 115.6(6) | O(2)–S(1)–O(1) <sup>f</sup>               | 109.5(3) |
| C(4)–N(2)–Zn(1)              | 122.4(5) | O(2) <sup>f</sup> –S(1)–O(1) <sup>f</sup> | 109.6(3) |
|                              |          | O(1)–S(1)–O(1) <sup>f</sup>               | 108.3(5) |

Symmetry codes: (a)  $-x, y, -z+1$ ; (b)  $x+1/2, y+1/2, z$ ; (c)  $-x-1/2, y+1/2, -z+1$ ; (d)  $-x-1, y, -z+1$ ; (e)  $x-1/2, y-1/2, z$ ; (f)  $-x, y, -z$ .

**Table S2.5** Selected bond lengths (Å) and angles (°) of complex **4**.

|                                            |           |                                            |           |
|--------------------------------------------|-----------|--------------------------------------------|-----------|
| Zn(1)–O(1)                                 | 2.167(6)  | O(1)–Zn(1)–N(2) <sup>b</sup>               | 90.01(19) |
| Zn(1)–O(1) <sup>a</sup>                    | 2.167(6)  | O(1) <sup>a</sup> –Zn(1)–N(2) <sup>b</sup> | 90.8(2)   |
| Zn(1)–N(1)                                 | 2.189(6)  | N(1)–Zn(1)–N(2) <sup>b</sup>               | 177.0(2)  |
| Zn(1)–N(1) <sup>a</sup>                    | 2.189(6)  | N(1) <sup>a</sup> –Zn(1)–N(2) <sup>b</sup> | 95.1(2)   |
| Zn(1)–N(2) <sup>b</sup>                    | 2.170(6)  | O(1)–Zn(1)–N(2) <sup>c</sup>               | 90.8(2)   |
| Zn(1)–N(2) <sup>c</sup>                    | 2.170(6)  | O(1) <sup>a</sup> –Zn(1)–N(2) <sup>c</sup> | 90.01(19) |
| Cr(1)–O(2) <sup>d</sup>                    | 1.648(6)  | N(1)–Zn(1)–N(2) <sup>c</sup>               | 95.1(2)   |
| Cr(1)–O(2)                                 | 1.648(6)  | N(1) <sup>a</sup> –Zn(1)–N(2) <sup>c</sup> | 177.0(2)  |
| Cr(1)–O(1)                                 | 1.654(5)  | N(2) <sup>b</sup> –Zn(1)–N(2) <sup>c</sup> | 87.8(3)   |
| Cr(1)–O(1) <sup>d</sup>                    | 1.654(5)  | O(2) <sup>d</sup> –Cr(1)–O(2)              | 108.8(5)  |
| C(1)–N(1)                                  | 1.477(9)  | O(2) <sup>d</sup> –Cr(1)–O(1)              | 109.6(3)  |
| C(1)–C(1) <sub>a</sub>                     | 1.541(13) | O(2)–Cr(1)–O(1)                            | 109.0(3)  |
| C(2)–N(1)                                  | 1.480(9)  | O(2) <sup>d</sup> –Cr(1)–O(1) <sup>d</sup> | 109.0(3)  |
| C(5)–N(2)                                  | 1.329(9)  | O(2)–Cr(1)–O(1) <sup>d</sup>               | 109.6(3)  |
| C(6)–N(2)                                  | 1.309(9)  | O(1)–Cr(1)–O(1) <sup>d</sup>               | 110.7(4)  |
| N(2)–Zn(1) <sup>e</sup>                    | 2.170(6)  | C(1)–N(1)–C(2)                             | 112.7(5)  |
| O(1)–Zn(1)–O(1) <sup>a</sup>               | 178.9(3)  | C(1)–N(1)–Zn(1)                            | 107.4(4)  |
| O(1)–Zn(1)–N(1)                            | 89.41(19) | C(2)–N(1)–Zn(1)                            | 115.4(4)  |
| O(1) <sup>a</sup> –Zn(1)–N(1)              | 89.72(19) | C(6)–N(2)–C(5)                             | 115.5(6)  |
| O(1)–Zn(1)–N(1) <sup>a</sup>               | 89.72(19) | C(6)–N(2)–Zn(1) <sup>e</sup>               | 121.4(5)  |
| O(1) <sup>a</sup> –Zn(1)–N(1) <sup>a</sup> | 89.41(19) | C(5)–N(2)–Zn(1) <sup>e</sup>               | 123.0(5)  |
| N(1)–Zn(1)–N(1) <sup>a</sup>               | 81.9(3)   | Cr(1)–O(1)–Zn(1)                           | 140.5(3)  |

Symmetry codes: (a)  $-x, y, -z-1$ ; (b)  $x+1/2, y+1/2, z$ ; (c)  $-x-1/2, y+1/2, -z-1$ ; (d)  $-x, y, -z-2$ ; (e)  $x-1/2, y-1/2, z$ .

**Table S3** Summary of multiple crystal datas for CPs **2M** and **2P**.

**Table S3.1** A summary of crystal data and refinement results of six randomly selected crystals for **2** grown in the presence of (1S)-(+)-10-camphorsulfonic acid.

|   | <i>a</i> (Å) | <i>b</i> (Å) | <i>c</i> (Å) | $\beta$ (°) | Vol. (Å <sup>3</sup> ) | R1     | wR2    | Flack param | helicity |
|---|--------------|--------------|--------------|-------------|------------------------|--------|--------|-------------|----------|
| 1 | 13.812(11)   | 12.752(11)   | 7.086(6)     | 90.796(12)  | 1248.0(18)             | 0.0585 | 0.1267 | 0.06(2)     | M        |
| 2 | 13.826(2)    | 12.699(2)    | 7.0542(16)   | 90.614(12)  | 1238.5(4)              | 0.0507 | 0.1543 | 0.05 (2)    | M        |
| 3 | 13.780(10)   | 12.737(10)   | 7.085(5)     | 90.867(12)  | 1243.4(16)             | 0.0529 | 0.1410 | 0.03(2)     | M        |
| 4 | 13.900(4)    | 12.808(5)    | 7.117(3)     | 90.70(3)    | 1266.9(8)              | 0.0622 | 0.1822 | 0.04(3)     | M        |
| 5 | 13.860(5)    | 12.635(4)    | 7.023(3)     | 90.49(3)    | 1229.9(8)              | 0.0743 | 0.2189 | 0.06(4)     | M        |
| 6 | 13.8078(18)  | 12.752(2)    | 7.0898(13)   | 90.901(10)  | 1248.2(4)              | 0.0391 | 0.1080 | 0.04(2)     | M        |

**Table S3.2** A summary of crystal data and refinement results of six randomly selected crystals for **2** grown in the presence of (1R)-(-)-10-camphorsulfonic acid.

|   | <i>a</i> (Å) | <i>b</i> (Å) | <i>c</i> (Å) | $\beta$ (°) | Vol. (Å <sup>3</sup> ) | R1     | wR2    | Flack param | helicity |
|---|--------------|--------------|--------------|-------------|------------------------|--------|--------|-------------|----------|
| 1 | 13.832(11)   | 12.752(11)   | 7.089(6)     | 90.880(15)  | 1250.2(18)             | 0.0498 | 0.1388 | 0.05(2)     | P        |
| 2 | 13.893(8)    | 12.735(7)    | 7.078(4)     | 91.062(9)   | 1252.0(12)             | 0.0375 | 0.1040 | 0.02 (2)    | P        |
| 3 | 13.769(4)    | 12.687(4)    | 7.053(2)     | 90.66(2)    | 1231.9(7)              | 0.0868 | 0.2433 | 0.14(4)     | P        |
| 4 | 13.78(2)     | 12.649(19)   | 7.026(11)    | 90.981(17)  | 1225(3)                | 0.0803 | 0.2251 | 0.08(4)     | P        |
| 5 | 13.799(12)   | 12.734(11)   | 7.079(6)     | 90.940(18)  | 1243.6(19)             | 0.0734 | 0.2312 | 0.04(4)     | P        |
| 6 | 13.8946(19)  | 12.691(2)    | 7.0517(12)   | 91.075(12)  | 1243.3(3)              | 0.0480 | 0.1478 | 0.03(3)     | P        |

**Figure S1** Structural formulas of the chiral inducing agents.

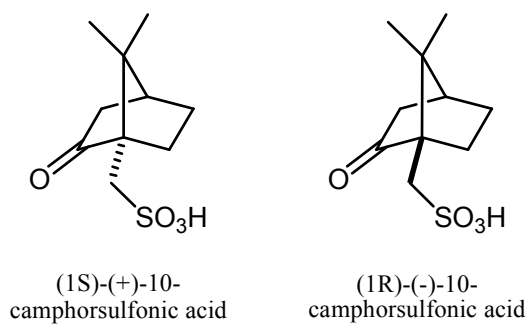

**Figure S2** Crystal structure for CPs 1-4.

**Figure S2.1** Crystal structure for CPs 1 contains two different layers, and they have a “mirror symmetry”.

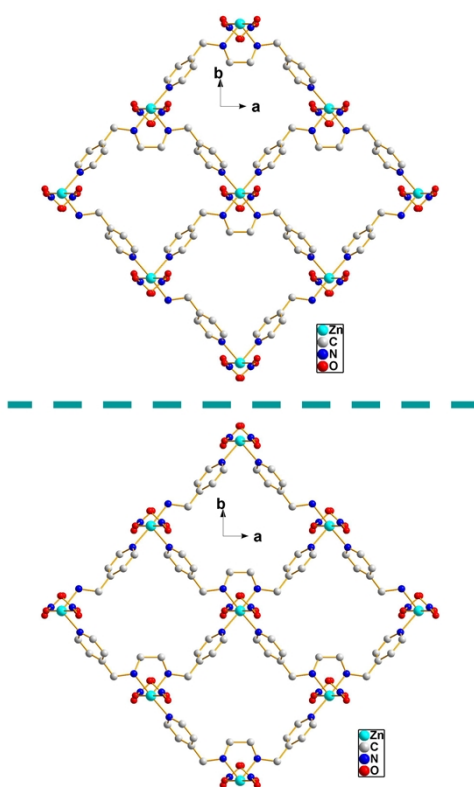

**Figure S2.2** (a) Crystal structure for CPs 2M and 2P. 2M (upper) and 2P (lower) have a “mirror symmetry”, which illustrates that they are supramolecular enantiomers. (b) Right- and left-handed helical motifs composed of inorganic chains of 2P and 2M.



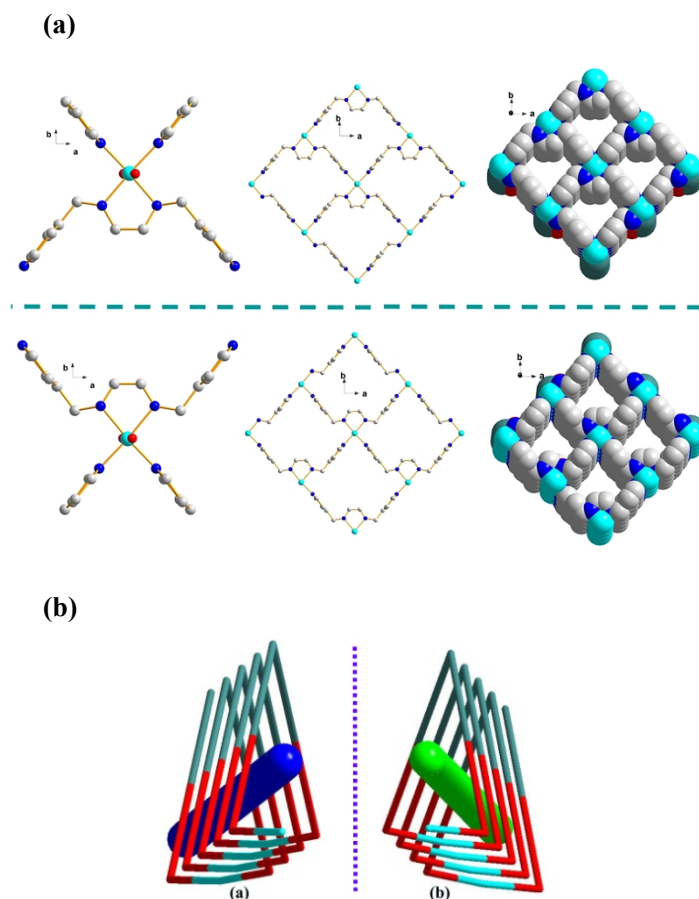

**Figure S2.3** Crystal diagrams for CPs **3**. (a) Coordination configurations of Zn(II) atom in crystal **3** (hydrogen atoms and disordered oxygen atoms have been omitted for clarity). Symmetry code: a)  $-x, y, -z+1$ ; b)  $x+1/2, y+1/2, z$ ; c)  $-x-1/2, y+1/2, -z+1$ ; d)  $-x-1, y, -z+1$ ; e)  $-x, y, -z$ . (b) 3D structure of **3** viewed down the a-axis. (c) 3D structure of **3** viewed down the c-axis. (d) The space-filling model of **3** viewed down the c-axis.

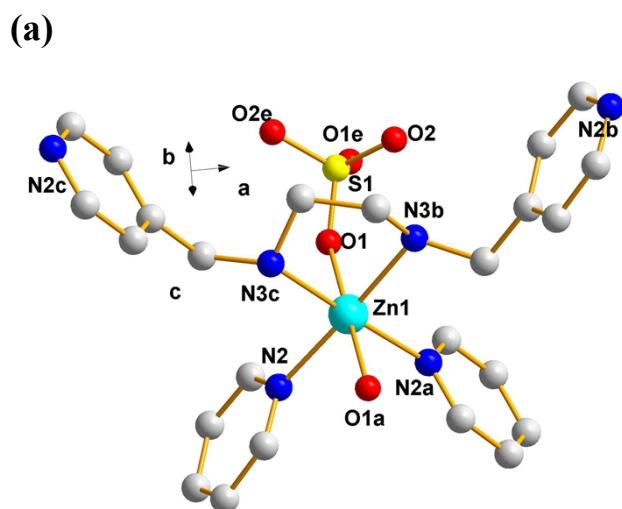

(b)

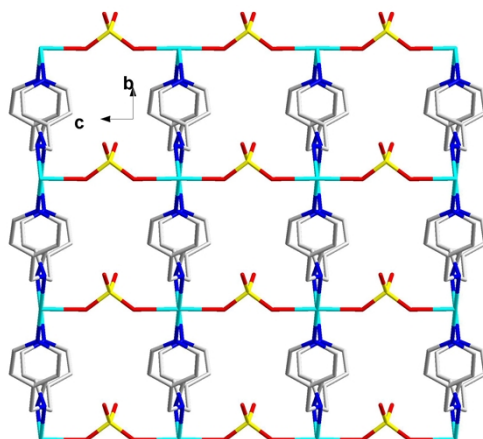

(c)

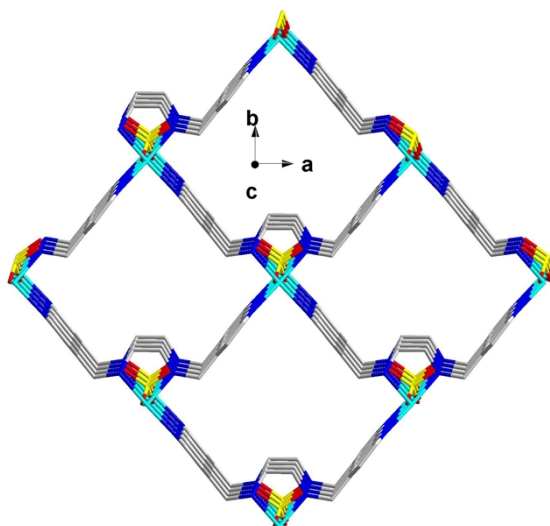

(d)

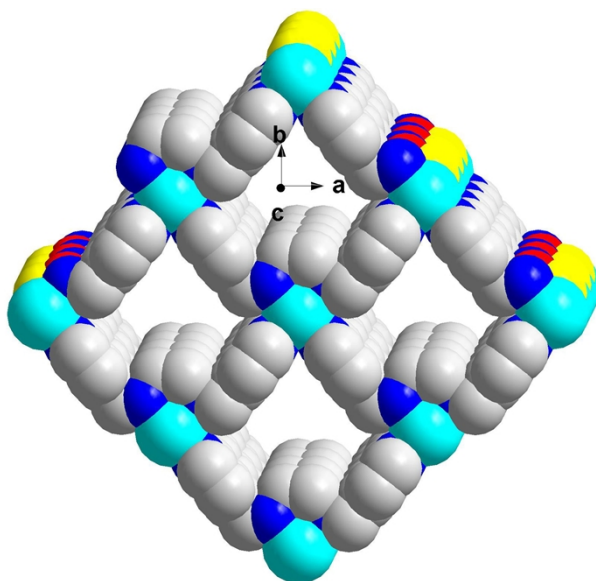

**Figure S2.4** Crystal structure for CPs **4**. (a) Coordination configurations of Zn(II) atom in crystal **4** (hydrogen atoms and disordered oxygen atoms have been omitted for clarity). Symmetry code: a)  $-x, y, -z-1$ ; b)  $x+1/2, y+1/2, z$ ; c)  $-x-1/2, y+1/2, -z-1$ ; d)  $-x, y, -z-2$ . (b) 3D structure of **4** viewed down the a-axis. (c) 3D structure of **4** viewed down the c-axis. (d) The space-filling model of **4** viewed down the c-axis.

(a)

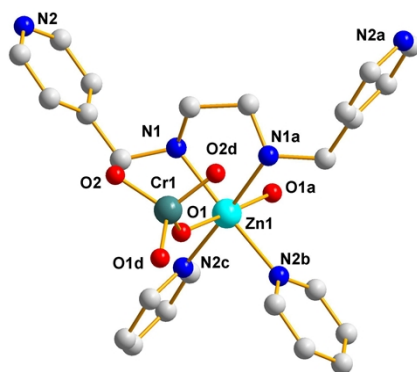

(b)

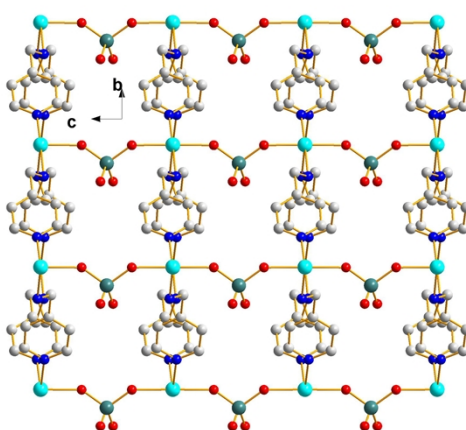

(c)

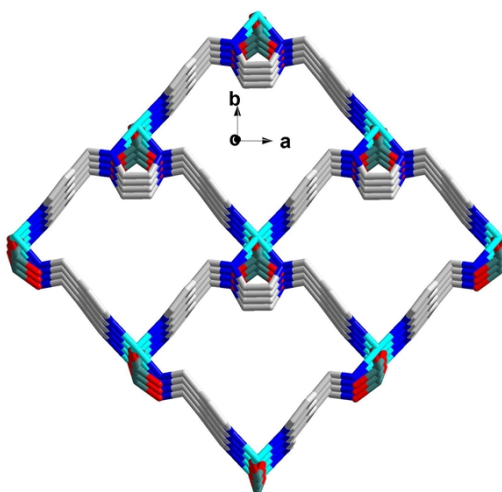

(d)

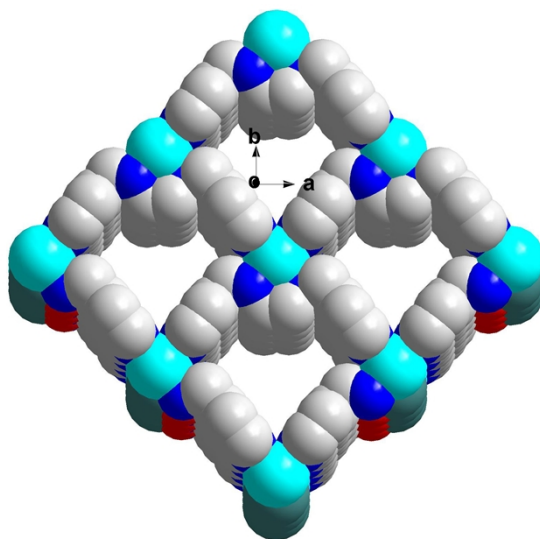

*Figure S3* PXRD patterns for CPs 1-4.

*Figure S3.1* PXRD patterns for CPs 1.

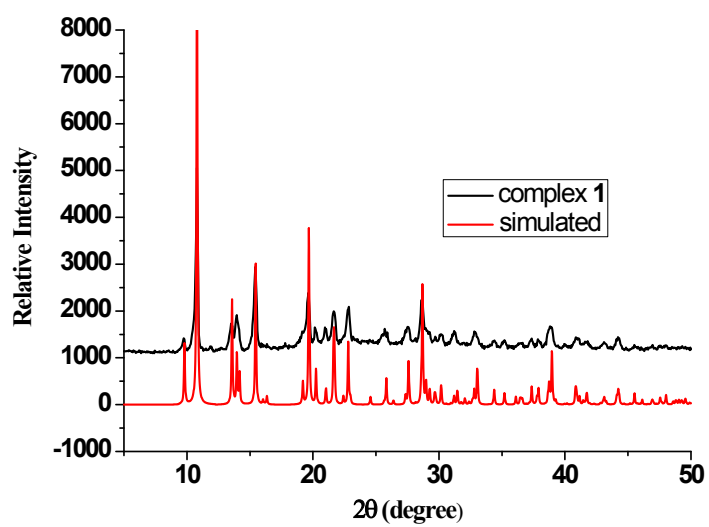

*Figure S3.2* PXRD patterns for CPs 2.

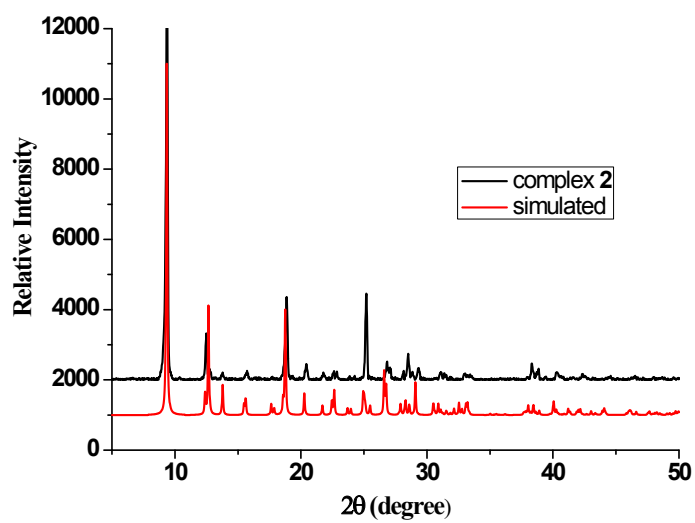

Figure S3.3 PXRD patterns for CPs 3.

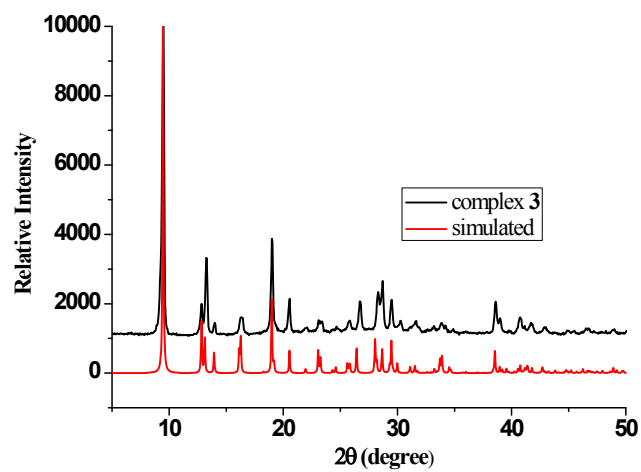

Figure S3.4 PXRD patterns for CPs 4.

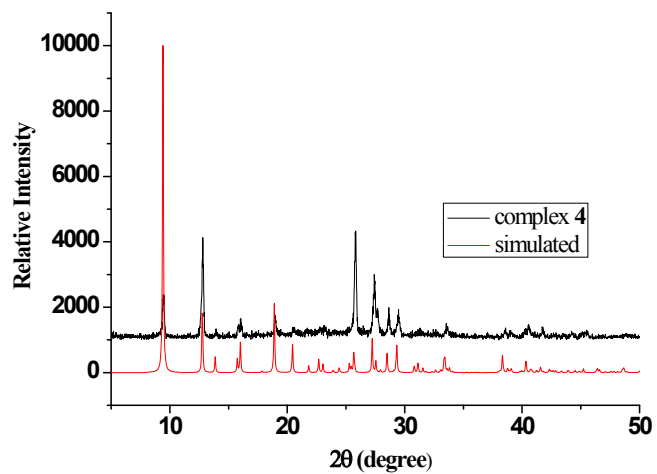

**Figure S4** TGA plots for CPs 1-4.

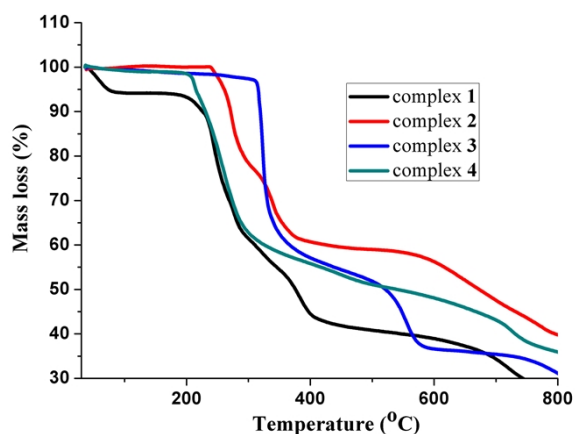

**Figure S5** The emission spectra of complexes 1-4 in solid state at room temperature.

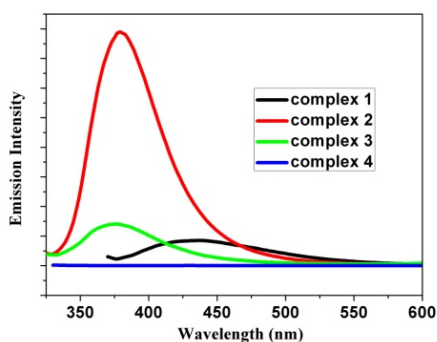

**Figure S6** Solid state CD spectra for different experiments.

**Figure S6.1** Solid state CD spectra recorded for 2 in the presence of (1S)-(+)-10-camphorsulfonic acid. All the bulk materials exhibit a positive CD signal at ~265 nm.

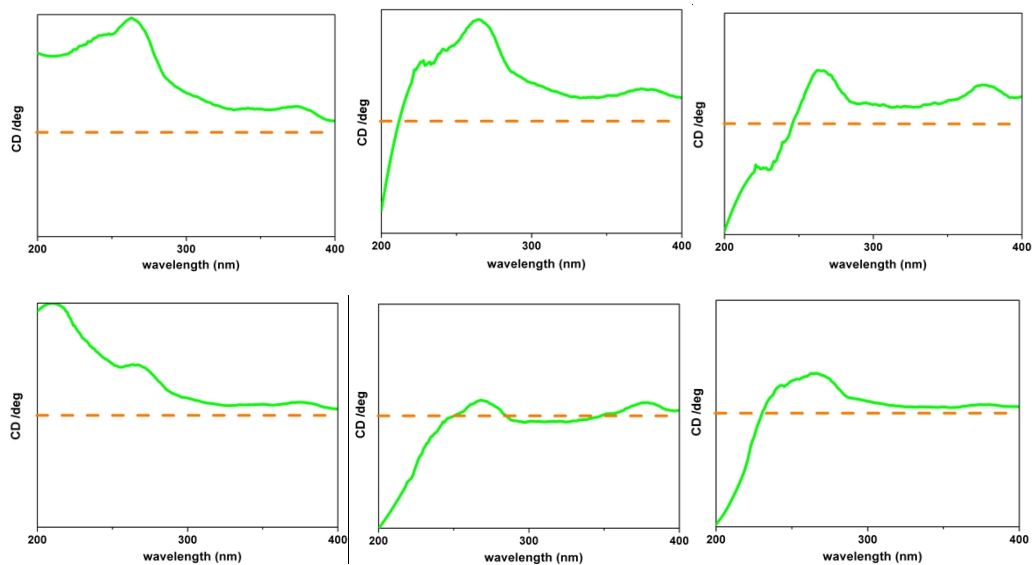

**Figure S6.2** Solid state CD spectra recorded for **2** in the presence of (1R)-(-)-10-camphorsulfonic acid. All the bulk materials exhibit a negative CD signal at  $\sim 265$  nm.

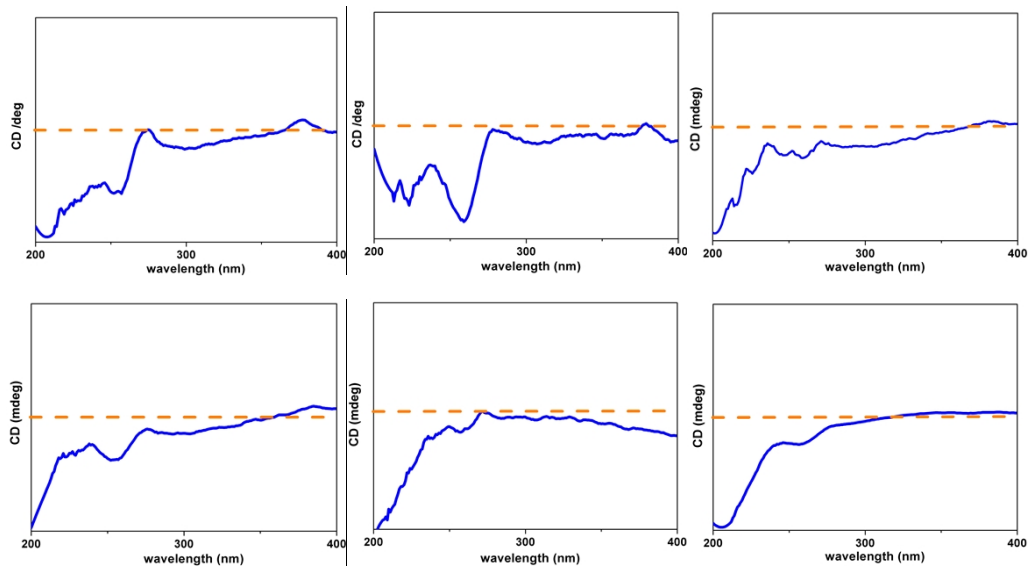

**Figure S7** Solid state UV-Vis spectra of CPs **2**.

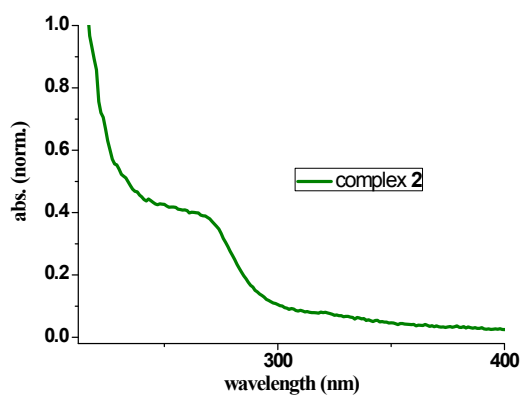

Supplement: c4cc03478c1.pdf [file c4cc03478c1.pdf]
